# Supplementary material for: Longitudinal changes in moderate‐to‐vigorous‐intensity physical activity in children and adolescents: A systematic review and meta‐analysis
Source: PubMed Central journal article supplement (PMC6916562; doi:10.1111/obr.12953), 2019-10-23
Supplement: OBR-21-na-s001.pdf [file OBR-21-na-s001.pdf]

Table S1. Sample search strategy using OVID

| Steps | Syntax                                                                                                                                                                                                                                                                                                                | Remarks                                      |
|-------|-----------------------------------------------------------------------------------------------------------------------------------------------------------------------------------------------------------------------------------------------------------------------------------------------------------------------|----------------------------------------------|
| 1     | exp Cohort Studies/ or longitudinal.ti,ab. or prospective.ti,ab.<br>or (follow?up).ti,ab.                                                                                                                                                                                                                             | Find all cohort studies                      |
| 2     | exp Clinical Trial/ or double-blind method/ or (clinical trial* or randomized controlled trial or multicenter study).pt. or exp Clinical Trials as Topic/ or ((randomi?ed adj7 trial*) or (controlled adj3 trial*) or (clinical adj2 trial*) or ((single or doubl* or tripl* or treb*) and (blind* or mask*))).ti,ab. | Find all RCTs                                |
| 3     | Exp Actigraphy/ or acceleromet*.ti,ab or actigraph.ti,ab or (CSA monitor).ti,ab or (activity monitor).ti,ab or (motion sensor).ti,ab                                                                                                                                                                                  | Find all studies that used accelerometer     |
| 4     | exp adolescent/ or exp child/ or exp minors/ or exp students/ or adolescen\$.ti,ab. or pre-adolescenc.ti,ab. or youth.ti,ab. or teen.ti,ab. or (young adj child*).ti,ab. or prepubescent.ti,ab. or pubescent.ti,ab. or schoolchild*.ti,ab. or boy*.ti,ab. or girl*.ti,ab. or juvenile.ti,ab.                          | Find all studies of children and adolescents |
| 5     | (Moderate to vigorous physical activity).ti,ab. or MVPA.ti,ab. or (moderate-to-vigorous-physical activity).ti,ab OR (moderate adj4 vigorous)                                                                                                                                                                          | Find moderate to vigorous physical activity  |
| 6     | (1 OR 2) AND (3 AND 4 AND 5)                                                                                                                                                                                                                                                                                          |                                              |

# Table S2A. Description of included studies and methods used for objective physical activity assessment

| No | Study, year                 | Data source | Year of recruitment at baseline                 | City, Country                                                                                                                                                                                                                                                                                         | Cohort Name                                                                                                      | Study Design       | Brand of Accelerometer                                            | Number of measurement days | Minimum days to consider valid | Wear time for valid day (h) | MVPA cutoff           | Year PA assessment commenced | Country            | Includes Weekend | Epoch Length (s) |
|----|-----------------------------|-------------|-------------------------------------------------|-------------------------------------------------------------------------------------------------------------------------------------------------------------------------------------------------------------------------------------------------------------------------------------------------------|------------------------------------------------------------------------------------------------------------------|--------------------|-------------------------------------------------------------------|----------------------------|--------------------------------|-----------------------------|-----------------------|------------------------------|--------------------|------------------|------------------|
| 1  | Augustine et al., 2012      | Email       | 2003                                            | Avon, United Kingdom                                                                                                                                                                                                                                                                                  | ALSPAC (Avon Longitudinal Study of Parents and Children)                                                         | Cohort             | ActiGraph AM 7164 and GT1M (at age 14 for some)                   | 7                          | 3d                             | 10h                         | 3200 cpm              | 2003                         | UK                 | Yes              | 60               |
| 2  | Azevedo et al., 2014        | Email       | Sep to Dec 2010                                 | North East of England.                                                                                                                                                                                                                                                                                | Dance mats                                                                                                       | Non RCT            | ActiGraph 7164                                                    | 7                          | 3d                             | 10h                         | 2296 cpm              | 2010                         | UK                 | Yes              | 30               |
| 3  | Butte et al., 2014          | Email       | 2007-2009                                       | San Francisco, USA                                                                                                                                                                                                                                                                                    |                                                                                                                  | Cohort             | Actical accelerometer                                             | 3                          | 3d                             | 16.6h                       | AEE>=0.10 for PAR>3.0 | 2007                         | USA                | Yes              | 60               |
| 4  | Carver et al., 2011         | Paper       | 2001                                            | Melbourne, Australia                                                                                                                                                                                                                                                                                  | CLAN (Children Living in Active Neighbourhoods)                                                                  | Cohort             | ActiGraph 7164                                                    | 8                          | 4d                             | 10h                         | 4 METS                | 2001                         | Australia          | Yes              | 60               |
| 5  | Cohen et al., 2014          | Paper       | 2008                                            | San Diego, CA suburban Minneapolis                                                                                                                                                                                                                                                                    | TAAG (Trial of Activity for Adolescent Girls)                                                                    | RCT                | ActiGraph 7164                                                    | 6                          | N/M                            | 8.3h on WE and 10.3h or WD  | 1500 cpm              | 2008                         | USA                | Yes              | 30               |
| 6  | Cohen et al., 2015          | Email       | Mar 2012                                        | Australia                                                                                                                                                                                                                                                                                             | SCORES (Supporting Children's Outcomes using Rewards, Exercise and Skills intervention)                          | RCT                | Actigraph GT3X+                                                   | 7                          | 3d                             | 8h                          | 2296 cpm              | 2012                         | Australia          | Yes              | 10               |
| 7  | Colabianchi et al., 2016    | Paper       | 2010-2011                                       | South Carolina, USA                                                                                                                                                                                                                                                                                   | TRACK (Transitions and Activity Changes in Kids)                                                                 | Cohort             | ActiGraph GT1M and GT3X                                           | 7                          | 2d                             | 8h                          | Freedson              | 2010                         | USA                | Yes              | 60               |
| 8  | Collings et al., 2015       | Email       | Apr-Jul 2005                                    | Cambridge-Shire                                                                                                                                                                                                                                                                                       | ROOTS                                                                                                            | Cohort             | Actiheart                                                         | 4                          | N/M                            | N/M                         | 4 METS                | 2005                         | UK                 | Yes              | 30               |
| 9  | Cooper et al., 2012         | Paper       | September 2006                                  | Bristol, UK                                                                                                                                                                                                                                                                                           | PEACH (Personal and Environmental Associations with Children's Health)                                           | Cohort             | GT1M; ActiGraph LLC, Pensacola                                    | 7                          | N/M                            | N/M                         | 2296 cpm              | 2006                         | UK                 | Yes              | N/M              |
| 10 | Corder et al., 2015         | Email       | 2007                                            | Norfolk East London                                                                                                                                                                                                                                                                                   | SPEEDY (Sport, Physical activity and Eating behaviour: Environmental Determinants in Young People)               | Cohort             | ActiGraph accelerometers (GT1M)                                   | 7                          | 3d                             | 8.3h                        | 2000 cpm              | 2007                         | UK                 | Yes              | 5                |
| 11 | Dalene et al., 2017         | Paper       | 2005                                            | Norway                                                                                                                                                                                                                                                                                                | PANCS (Physical Activity among Norwegian Children Study)                                                         | Cohort             | Actigraph 7164,GT1,GT3X+                                          | 4d at baseline 7 d post    | 2d                             | 8h                          | 2000 cpm              | 2005                         | USA                | Yes              | 10               |
| 12 | Davison et al., 2009        | Paper       | N/M                                             | Pennsylvania                                                                                                                                                                                                                                                                                          |                                                                                                                  | Cohort             | ActiGraph 7164                                                    | 7                          | 4d                             | 10h                         | Freedson              |                              | USA                | Yes              | 30               |
| 13 | De Craemer et al., 2014     | Email       | March to Jun 2012                               | North Belgium                                                                                                                                                                                                                                                                                         | The Toy Box study                                                                                                | RCT                | ActiGraph GT1M, GT3X and GT3X +                                   | 6                          | 3d                             | 6h                          | 2296 cpm              | 2012                         | Belgium            | Yes              | 15               |
| 14 | De Meester et al., 2014     | Paper       | 2009-2010                                       | East-West Flanders, Belgium                                                                                                                                                                                                                                                                           |                                                                                                                  | Cohort             | ActiGraph GT1                                                     | 7                          | 3d                             | 10h                         | 3200 cpm              | 2009                         | Belgium            | No               | 60               |
| 15 | Dencker et al., 2013        | Email       | Not mentioned                                   | Malmö, Sweden                                                                                                                                                                                                                                                                                         |                                                                                                                  | Cohort             | MTI models 7164                                                   | 4                          | 3d                             | 8h                          | 3500 cpm              |                              | Sweden             | Yes              | 10               |
| 16 | Dewar et al., 2014          | Email       | May 2010                                        | Newcastle, Australia                                                                                                                                                                                                                                                                                  | NEAT (Nutrition and Enjoyable Activity for Teen Girls Study)                                                     | RCT                | MTI models 7164; GT1M, GT3X                                       | 7                          | 3d                             | 10h                         | Freedson              | 2010                         | Australia          | Yes              | 30               |
| 17 | Edwards et al., 2013        | Paper       | 2001                                            | Cincinnati, USA                                                                                                                                                                                                                                                                                       | Cincinnati Children's Hospital Medical Center (CCHMC)                                                            | Cohort             | RT3                                                               | 3                          | 1d                             | 8h                          | 1400 cpm              | 2001                         | USA                | Yes              | 60               |
| 18 | Farooq et al., 2017         | Email       | Oct 2006 to Dec 2007                            | North East of England.                                                                                                                                                                                                                                                                                | GMS (The Gateshead Millennium Study)                                                                             | Cohort             | Actigraph GT1M                                                    | 7                          | 3d                             | 6h                          | 2296 cpm              | 2006                         | UK                 | Yes              | 15               |
| 19 | Grydeland et al., 2013      | Paper       | Sep 2007                                        | Norway                                                                                                                                                                                                                                                                                                | HEIA (HEalth in Adolescents)                                                                                     | RCT                | ActiGraph 7164 and GT1M                                           | 5                          | 3d                             | 8h                          | 2000cpm               | 2007                         | Norway             | Yes              | 10               |
| 20 | Harding et al., 2015        | Email       | 2008/2009                                       | Bristol, UK                                                                                                                                                                                                                                                                                           | PEACH (Personal and Environmental Associations with Children's Health)                                           | Cohort             | ActiGraph GT1M                                                    | 7                          | N/M                            | N/M                         | 2296 cpm              | 2008                         | UK                 | Yes              | N/M              |
| 21 | Harrington et al., 2018     | Email       | Spring 2015                                     | Leicester City, Leicestershire and Rutland (LLR), UK                                                                                                                                                                                                                                                  | Girls Active                                                                                                     | RCT                | GENEActiv                                                         | 7                          | 2d                             | >16h                        | N/M or referenced     | 2015                         | UK                 | Yes              | N/M              |
| 22 | Jaakkola et al., 2019       | Email       | 2013-2014                                       | Finland                                                                                                                                                                                                                                                                                               | Finnish Schools on the Move                                                                                      | Cohort             | Actigraph GT3X+ or wGT3X+                                         | 7                          | 3d                             | 8.3h                        | 2296 cpm              | 2013                         | Finland            | Yes              | 15               |
| 23 | Jago et al., 2015           | Paper       | Nov 2013                                        | Bristol, UK                                                                                                                                                                                                                                                                                           | Bristol Girls Dance Project                                                                                      | RCT                | ActiGraph GT3X+                                                   | 7                          | 3d                             | 8.3h                        | 2296 cpm              | 2013                         | UK                 | Yes              | N/M              |
| 24 | Jago et al., 2017           | Paper       | Feb 2012-Jul 2013                               | Bristol, UK                                                                                                                                                                                                                                                                                           | B-PROACTIV                                                                                                       | Cohort             | ActiGraph wGTX3                                                   | 5                          | 2 d (weekend)                  | 8.3h                        | 2296 cpm              | 2012                         | UK                 | Yes              | N/M              |
| 25 | Janz et al., 2014           | Paper       | 1998                                            | Iowa                                                                                                                                                                                                                                                                                                  | IBDS (Iowa Bone Development Study)                                                                               | Cohort             | ActiGraph GT1M, GT3                                               | 4-5d                       | 3d                             | 10h                         | 2296 cpm              | 1998                         | USA                | Yes              | 60               |
| 26 | Jauregui et al., 2012       | Email       | Mar 2004                                        | Cuernavaca, Mexico.                                                                                                                                                                                                                                                                                   |                                                                                                                  | Cohort             | RT3                                                               | 5                          | 1d (avg 4d)                    | avg 13.6h/d                 | 970 cpm               | 2004                         | Mexico             | Yes              | 60               |
| 27 | Leppanen et al., 2017       | Email       | 2014-2016                                       | Sweden                                                                                                                                                                                                                                                                                                | MINISTOP                                                                                                         | RCT                | Actigraph wGT3x-BT                                                | 7                          | 3d                             | 10h                         | 818#                  | 2014                         | Sweden             | Yes              | 10               |
| 28 | Lima et al., 2017           | Email       | 2001                                            | Copenhagen                                                                                                                                                                                                                                                                                            | Copenhagen School Child Intervention Study (CoSCIS)                                                              | Cohort             | ActiGraph 7164, GT1M                                              | 4                          | 3d                             | 8h                          | 1500 cpm              | 2001                         | Denmark            | Yes              | 10               |
| 29 | Lipsky et al., 2017         | Email       | 2010                                            | Nationally representative sample of USA                                                                                                                                                                                                                                                               | The NEXT Plus                                                                                                    | Cohort             | ActiGraph GT3X                                                    | 7                          | 4d                             | 8.3h                        | 2296 cpm              | 2010                         | USA                | Yes              | 30               |
| 30 | Magnusson et al., 2011      | Paper       | 2006                                            | Reykjavik, Iceland                                                                                                                                                                                                                                                                                    |                                                                                                                  | RCT                | ActiGraph GT1M                                                    | 7                          | 2d                             | 10h                         | 2000 cpm              | 2006                         | Iceland            | No               | 60               |
| 31 | Marques et al., 2016        | Paper       | 2010                                            | Oeiras Municipality, in Lisbon Metropolitan area, Portugal.                                                                                                                                                                                                                                           |                                                                                                                  | Cohort             | ActiGraph GT1M                                                    | N/M                        | 3d                             | 10h                         | 4 METS                | 2010                         | Portugal           | Yes              | 15               |
| 32 | Metcalf et al., 2011        | Email       | Jan 2000 to Jan 2001                            | Plymouth, UK                                                                                                                                                                                                                                                                                          | The EarlyBird study                                                                                              | Cohort             | Actigraph accelerometers (formerly MTI/CSA)                       | 7                          | 5 d (1 weekend day)            | 9h                          | N/M or referenced     | 2000                         | UK                 | Yes              | 10               |
| 33 | Michels et al., 2016        | Email       | 2008                                            | Switzerland                                                                                                                                                                                                                                                                                           | The Ballabeina study                                                                                             | Cohort             | ActiGraph MTI/CSA 7164;                                           | 5                          | 3d                             | 6h                          | 2292 cpm              | 2008                         | Switzerland        | Yes              | 15               |
| 34 | Mitchel et al., 2013        | Paper       | 2000                                            | (1) Little Rock, Arkansas; (2) Irvine, California; (3) Lawrence, Kansas; (4) Boston, Massachusetts; (5) Philadelphia, Pennsylvania; (6) Pittsburgh, Pennsylvania; (7) Charlottesville, Virginia; (8) Seattle, Washington; (9) Hickory and Morganton, North Carolina; and (10) Madison, Wisconsin, USA | National Institute of Child Health and Human Development (NICHD) Study of Early Child Care and Youth Development | Cohort             | ActiGraph 7164, ActiGraph GTM1                                    | 7                          | 3d                             | 10h                         | 2296 cpm              | 2000                         | USA                | Yes              | 60               |
| 35 | Ornelas et al., 2011        | Paper       | 2000                                            | Madeira, Portugal                                                                                                                                                                                                                                                                                     |                                                                                                                  | Cohort             | WAM 7164, CSA, GT1M ActiGraph                                     | 3                          | 3d                             | N/M                         | 2000 cpm              | 2000                         | Portugal           | Yes              | 60               |
| 36 | Ortega et al., 2013         | Paper       | 1998                                            | Tartu city (Estonia)                                                                                                                                                                                                                                                                                  | EYHS (The European Youth Heart Study)                                                                            | Cohort             | ActiGraph AM7164 at baseline and GT1M at followup                 | 4                          | 3d                             | 10h                         | 2000 cpm              | 1998                         | Estonia            | Yes              | 60               |
| 37 | Owen et al., 2018           | Email       | Jan-Apr 2014                                    | Western Sydney                                                                                                                                                                                                                                                                                        | AMPED (Activity and Motivation in Physical Education)                                                            | Cohort             | Actigraph wGT3x+                                                  | 7                          | 1d                             | 8h                          | 2296 cpm              | 2014                         | Australia          | Yes              | 1                |
| 38 | Pardo et al., 2014          | Paper       | Oct 2009                                        | Huesca, Spain                                                                                                                                                                                                                                                                                         | Sigue la Huella                                                                                                  | Quasi-experimental | ActiGraph GT1M                                                    | 7                          | 4d                             | 10h                         | 2292 cpm              | 2009                         | Spain              | Yes              | 30               |
| 39 | Ridgers et al., 2013        | Email       | 2006                                            | Melbourne, Australia                                                                                                                                                                                                                                                                                  | HEAPS (Healthy Eating and Play Study)                                                                            | Cohort             | ActiGraph 7164                                                    | 8                          | 3d                             | 10h                         | 4 METS                | 2006                         | Australia          | Yes              | 60               |
| 40 | Santos et al., 2018         | Paper       | 2009-2010                                       | Porto, Portugal                                                                                                                                                                                                                                                                                       |                                                                                                                  | Cohort             | Actigraph, GT1M                                                   | 7                          | 4d                             | 10h                         | 2296 cpm              | 2009                         | Portugal           | Yes              | 5                |
| 41 | Schwarzfischer et al., 2019 | Email       | 2008-2014                                       | 5 European countries: Germany, Italy, Belgium, Poland, and Spain.                                                                                                                                                                                                                                     | Childhood Obesity Project                                                                                        | Longitudinal study | SenseWear Armband 2                                               | 3                          | 2d                             | N/M                         | 4 METS                | 2008                         | European countries | No               | N/M              |
| 42 | Stefan et al., 2018         | Paper       | Mar & Jun 2014                                  | Zagreb (Croatia)                                                                                                                                                                                                                                                                                      | CROPALS (Croatian Physical Activity in Adolescence Longitudinal Study)                                           | Cohort             | SenseWear Armband using Actigraph accelerometers (MTI model 7164) | 5                          | 3d                             | 10h                         | 4 METS                | 2014                         | Croatia            | Yes              | N/M              |
| 43 | Stevens et al., 2007        | Paper       | Spring 2003                                     | Tucson, Arizona; San Diego, California; New Orleans, Louisiana; Baltimore, Maryland/Washington, DC; Minneapolis, Minnesota; and Columbia, South Carolina.                                                                                                                                             | TAAG (Trial of Activity for Adolescent Girls)                                                                    | RCT                | Actigraph accelerometers (MTI model 7164)                         | 6                          | 6d                             | at least 80% of 18h         | 4.6 METS              | 2003                         | USA                | Yes              | 30               |
| 44 | Sutherland et al., 2016     | Email       | Mar to Jun 2012                                 | NSW, Disadvantaged schools, Australia                                                                                                                                                                                                                                                                 | PA4E1 (Physical Activity for Every One)                                                                          | RCT                | ActiGraph GT3X+ and GT3X Mini-Mitter (Bend, OR)                   | 7                          | 3d                             | 10h                         | 2296 cpm              | 2012                         | Australia          | Yes              | 15               |
| 45 | Taylor et al., 2009         | Paper       | N/M                                             | Dunedin, New Zealand                                                                                                                                                                                                                                                                                  | FLAMES (Family, Lifestyle, Activity, Movement, and Eating Study)                                                 | Cohort             | omnidirectional Actical accelerometers                            | 5                          | N/M                            | N/M                         | 0.4 kcal/kg/min       |                              | New Zealand        | No               | N/M              |
| 46 | Telford et al., 2013        | Paper       | Sep to Dec 2005                                 | Canberra, Australia                                                                                                                                                                                                                                                                                   | LOOK (Lifestyle of Our Kids)                                                                                     | Cohort             | ActiGraph GT1M                                                    | 7                          | N/M                            | 10h                         | 2296 cpm              | 2005                         | Australia          | Yes              | 60               |
| 47 | Telford et al., 2015        | Paper       | Sep to Dec 2005                                 | Canberra, Australia                                                                                                                                                                                                                                                                                   | LOOK (Lifestyle of Our Kids)                                                                                     | Cohort             | ActiGraph GT1M                                                    | 7                          | N/M                            | 10h                         | 2296 cpm              | 2005                         | Australia          | Yes              | 60               |
| 48 | Ten Hoor et al., 2018       | Email       | Mar 2015                                        | Dutch, Netherlands                                                                                                                                                                                                                                                                                    |                                                                                                                  | RCT                | Actigraph GT3x                                                    | 5                          | 3d                             | 8h                          | 2296                  | 2015                         | Netherlands        | Yes              | N/M              |
| 49 | Vaipuna et al., 2018        | Email       | March 2010 to Dec 2011 & March 2012 to Dec 2013 | New Zealand                                                                                                                                                                                                                                                                                           | PLAY                                                                                                             | RCT                | Actigraph GT3x                                                    | 8                          | 2d                             | 8h                          | 2296                  | 2010                         | New Zealand        | Yes              | 15               |
| 50 | Vaisto et al., 2019         | Email       | 2007-2009                                       | Kuopio, Finland                                                                                                                                                                                                                                                                                       | Physical activity and nutrition in children (PANIC)                                                              | Cohort             | Actiheart                                                         | 4                          | >>4.1d                         | 12h                         | 4 METS                | 2007                         | Finland            | Yes              | 60               |
| 51 | Vaitkeviciute et al., 2014  | Paper       | 2010                                            | Tartu city (Estonia)                                                                                                                                                                                                                                                                                  |                                                                                                                  | Cohort             | GT1M (ActiGraph, Pensacola, USA)                                  | 7                          | 3d                             | 8h                          | 2000 cpm              | 2010                         | Estonia            | Yes              | 15               |
| 52 | Vann Kann et al., 2016      | Email       | Mar-Jun 2013                                    | Southern Limburg Netherlands                                                                                                                                                                                                                                                                          | The Active Living                                                                                                | Quasi-experimental | Actigraph GT3X+                                                   | 5                          | 1d                             | 8h                          | 2296 cpm              | 2013                         | Netherlands        | No               | 10               |

N/M: Not mentioned; # Wrist worn



**Table S2B. Moderate-to-vigorous physical activity (min/day) at baseline and subsequent follow up each year among boys and girls in the included studies**

| No      | Study, year                 | Gender | Baseline |     |           |                        | After 1 yr           |     | After 2 yr          |     | After 3 yr   |    | After 4 yr   |    | After 5 yr   |              | After 6 yr   |   | After 7 yr   |   | After 8 yr   |   | After 9 yr   |   | After 10 yr  |   | After 12 year |   |              |
|---------|-----------------------------|--------|----------|-----|-----------|------------------------|----------------------|-----|---------------------|-----|--------------|----|--------------|----|--------------|--------------|--------------|---|--------------|---|--------------|---|--------------|---|--------------|---|---------------|---|--------------|
|         |                             |        | N        | age | Region    | Age (mean±SD) [Median] | MVPA min/day         | N   | MVPA min/day        | N   | MVPA min/day | N  | MVPA min/day | N  | MVPA min/day | N            | MVPA min/day | N | MVPA min/day | N | MVPA min/day | N | MVPA min/day | N | MVPA min/day | N | MVPA min/day  | N | MVPA min/day |
| 40      | Santos et al., 2018         | Girls  | 29       | 14  |           | 14                     | 23.7±13.9            |     |                     | 29  | 20.3±14.5    |    |              |    |              |              |              |   |              |   |              |   |              |   |              |   |               |   |              |
|         |                             | Boys   | 28       | 6   | 2009      | 6.3±0.3                | 74.7±13.8            |     |                     |     |              | 28 | 76.2±19.1    |    |              |              |              |   |              |   |              |   |              |   |              |   |               |   |              |
|         |                             | Girls  | 36       | 6   |           | 6.3±0.3                | 60.8±14.1            |     |                     |     |              | 36 | 56.7±18.9    |    |              |              |              |   |              |   |              |   |              |   |              |   |               |   |              |
| 41      | Schwarzfischer et al., 2019 | Boys   | 136      | 6   |           | 6                      | 126.02±59.79         |     |                     | 136 | 146.70±71.65 |    |              |    | 141          | 108.77±53.77 |              |   |              |   |              |   |              |   |              |   |               |   |              |
|         |                             | Girls  | 161      | 6   | 2008      | 6                      | 102.25±58.93         |     |                     | 161 | 98.65±64.41  |    |              |    | 162          | 67.14±48.38  |              |   |              |   |              |   |              |   |              |   |               |   |              |
| 42      | Stefan et al., 2018         | Boys   | 28       | 15  |           | 15.5±0.3               | Mod:121±51<br>Vig:22 | 28  | Mod:72±29<br>Vig:8  |     |              |    |              |    |              |              |              |   |              |   |              |   |              |   |              |   |               |   |              |
|         |                             | Girls  | 53       | 15  | 2014      | 15.6±0.4               | Mod:79±29<br>Vig:5   | 53  | Mod:58±41<br>Vig:2  |     |              |    |              |    |              |              |              |   |              |   |              |   |              |   |              |   |               |   |              |
| 43      | Stevens et al., 2007        | Girls  | 984      | 12  | 2003      | 11.9±0.4               | 23.5±11.6            |     |                     | 984 | 22.0±10.8    |    |              |    |              |              |              |   |              |   |              |   |              |   |              |   |               |   |              |
| 44      | Sutherland et al., 2016     | Boys   | 239      | 12  |           | 12                     | 61.03±22.82          | 124 | 62.24±23.8          | 82  | 66.48±39.16  |    |              |    |              |              |              |   |              |   |              |   |              |   |              |   |               |   |              |
|         |                             | Girls  | 254      | 12  | 2012      | 12                     | 46.97±16.30          | 160 | 45.75±16.29         | 109 | 45.06±18.52  |    |              |    |              |              |              |   |              |   |              |   |              |   |              |   |               |   |              |
| 45      | Taylor et al., 2009         | Girls  | 95       | 3   |           | 3                      | 44±53                | 79  | 17±16               | 81  | 23±24        |    |              |    |              |              |              |   |              |   |              |   |              |   |              |   |               |   |              |
|         |                             | Boys   | 113      | 3   | 0         | 3                      | 40±55                | 101 | 16±20               | 105 | 21±23        |    |              |    |              |              |              |   |              |   |              |   |              |   |              |   |               |   |              |
| 46 & 47 | Telford et al., 2013 & 2015 | Boys   | 282      | 11  | Australia | 11.1±0.4               | 43(5th 6, 95th 116)  | 270 | 43(5th 6, 95th 110) |     |              |    |              | 81 | 26.34        |              |              |   |              |   |              |   |              |   |              |   |               |   |              |
|         |                             | Girls  | 266      | 11  |           | 11.1±0.4               | 31(5th 5, 95th 88)   | 265 | 30(5th 4, 95th 81)  |     |              |    |              | 76 | 20.69        |              |              |   |              |   |              |   |              |   |              |   |               |   |              |
| 48      | Ten Hoor et al., 2018       | Boys   | 24       | 12  |           | 12                     | 39.86±23.65          | 24  | 30.84±18.56         |     |              |    |              |    |              |              |              |   |              |   |              |   |              |   |              |   |               |   |              |
|         |                             | Girls  | 41       | 12  |           | 12                     | 25.77±16.89          | 41  | 25.5±16.14          |     |              |    |              |    |              |              |              |   |              |   |              |   |              |   |              |   |               |   |              |
|         |                             | Boys   | 15       | 13  | 2015      | 13                     | 31.13±19.71          | 15  | 29.22±19.01         |     |              |    |              |    |              |              |              |   |              |   |              |   |              |   |              |   |               |   |              |
|         |                             | Girls  | 18       | 13  |           | 13                     | 25.6±10.94           | 18  | 19.56±12.21         |     |              |    |              |    |              |              |              |   |              |   |              |   |              |   |              |   |               |   |              |
| 49      | Vaipuna et al., 2018        | Boys   | 53       | 6   |           | 6.54±0.26              | 64.5±24.4            | 53  | 73.4±32.9           | 41  | 63.5±26.1    |    |              |    |              |              |              |   |              |   |              |   |              |   |              |   |               |   |              |
|         |                             | Boys   | 33       | 7   |           | 7.4±0.3                | 60.6±22.8            | 33  | 77.24±28.30         | 29  | 57.53±35.27  |    |              |    |              |              |              |   |              |   |              |   |              |   |              |   |               |   |              |
|         |                             | Boys   | 58       | 8   |           | 8.5±0.23               | 61.25±31.51          | 58  | 72.93±31.3          | 46  | 69.82±33.45  |    |              |    |              |              |              |   |              |   |              |   |              |   |              |   |               |   |              |
|         |                             | Boys   | 23       | 9   |           | 9.4±0.29               | 64.77±32.2           | 23  | 57.74±21.23         | 17  | 50.21±29.6   |    |              |    |              |              |              |   |              |   |              |   |              |   |              |   |               |   |              |
|         |                             | Girls  | 55       | 6   | 2010      | 6.54±0.27              | 57.54±24.67          | 55  | 57.42±24.87         | 48  | 57.96±24.32  |    |              |    |              |              |              |   |              |   |              |   |              |   |              |   |               |   |              |
|         |                             | Girls  | 49       | 7   |           | 7.43±0.27              | 54.21±22.30          | 49  | 66.28±30.84         | 46  | 53.91±24.02  |    |              |    |              |              |              |   |              |   |              |   |              |   |              |   |               |   |              |
|         |                             | Girls  | 66       | 8   |           | 8.52±0.28              | 46.68±19.85          | 66  | 57.95±32.85         | 56  | 45.29±22.53  |    |              |    |              |              |              |   |              |   |              |   |              |   |              |   |               |   |              |
|         |                             | Girls  | 28       | 9   |           | 9.36±0.29              | 60.86±29.75          | 28  | 48.78±24.12         | 21  | 48.77±27.72  |    |              |    |              |              |              |   |              |   |              |   |              |   |              |   |               |   |              |
| 50      | Vaisto et al., 2019         | Boys   | 147      | 7   | 2007      | 7.7±0.4                | 129.4±67.5           |     |                     | 147 | 121.3±59.5   |    |              |    |              |              |              |   |              |   |              |   |              |   |              |   |               |   |              |
|         |                             | Girls  | 165      | 7   |           | 7.6±0.4                | 96.0±54.3            |     |                     | 165 | 77.4±40.5    |    |              |    |              |              |              |   |              |   |              |   |              |   |              |   |               |   |              |
| 51      | Vaitkeviciute et al., 2014  | Boys   | 96       | 12  | 2010      | 12.1±0.95              | 64.5 ± 23.5          | 96  | 60.4 ± 25.8         | 96  | 56.5 ± 26.1  |    |              |    |              |              |              |   |              |   |              |   |              |   |              |   |               |   |              |
| 52      | Vann Kann et al., 2016      | Boys   | 42       | 9   |           | 9                      | 66.54±20.59          | 21  | 62.77±19.26         |     |              |    |              |    |              |              |              |   |              |   |              |   |              |   |              |   |               |   |              |
|         |                             | Girls  | 76       | 9   |           | 9                      | 53.65±23.15          | 52  | 46.47±19.07         |     |              |    |              |    |              |              |              |   |              |   |              |   |              |   |              |   |               |   |              |
|         |                             | Boys   | 52       | 10  | 2013      | 10                     | 63.58±24.05          | 27  | 64.62±30.46         |     |              |    |              |    |              |              |              |   |              |   |              |   |              |   |              |   |               |   |              |
|         |                             | Girls  | 72       | 10  |           | 10                     | 52.98±19.40          | 36  | 44.71±19.00         |     |              |    |              |    |              |              |              |   |              |   |              |   |              |   |              |   |               |   |              |

† Weekdays; ‡ Weekends; [at school]; {after school}; Median [IQR]; mean±SD

Table S3: Risk of Bias assessment and summary

| Included studies           | Selection Bias | Performance Bias (Accelerometer) | Detection Bias (MVPA) | Detection bias (MVPA change/year) | Attrition Bias (MVPA) | Attrition Bias (MVPA Change/year) | Selective Reporting Bias | Other Sources of Bias |
|----------------------------|----------------|----------------------------------|-----------------------|-----------------------------------|-----------------------|-----------------------------------|--------------------------|-----------------------|
| Augustin et al., 2012      | +              | +                                | +                     | +                                 | +                     | +                                 | +                        | +                     |
| Azevedo et al.             | ?              | +                                | +                     | +                                 | -                     | +                                 | +                        | +                     |
| Butte et al., 2014         | ?              | ?                                | +                     | +                                 | +                     | +                                 | +                        | +                     |
| Carver et al., 2011        | ?              | +                                | +                     | +                                 | -                     | +                                 | +                        | +                     |
| Cohen et al., 2014         | +              | ?                                | +                     | -                                 | +                     | +                                 | +                        | +                     |
| Cohen et al., 2015         | ?              | +                                | +                     | +                                 | -                     | -                                 | +                        | +                     |
| Colabianchiet et al., 2016 | ?              | ?                                | +                     | -                                 | +                     | +                                 | +                        | +                     |
| Collings et al., 2015      | +              | -                                | +                     | +                                 | -                     | +                                 | +                        | +                     |
| Cooper et al., 2012        | ?              | +                                | -                     | -                                 | -                     | -                                 | +                        | +                     |
| Corder et al., 2015        | +              | -                                | +                     | +                                 | -                     | -                                 | +                        | +                     |
| Dalene et al., 2017        | +              | ?                                | +                     | +                                 | -                     | -                                 | +                        | +                     |
| Davison et al., 2009       | +              | +                                | +                     | -                                 | +                     | +                                 | +                        | +                     |
| De Craemer et al., 2014    | +              | ?                                | +                     | +                                 | -                     | -                                 | +                        | +                     |
| De Meester et al., 2014    | ?              | +                                | +                     | +                                 | -                     | +                                 | +                        | +                     |
| Dencker et al., 2013       | ?              | +                                | +                     | +                                 | ?                     | +                                 | +                        | +                     |
| Dewar et al., 2013         | +              | +                                | +                     | +                                 | +                     | +                                 | +                        | +                     |
| Edwards et al., 2013       | -              | -                                | +                     | -                                 | +                     | -                                 | +                        | +                     |
| Farooq et al., 2017        | +              | ?                                | +                     | +                                 | +                     | +                                 | +                        | +                     |
| Grydeland et al., 2013     | ?              | +                                | +                     | +                                 | +                     | +                                 | +                        | +                     |
| Harding et al., 2015       | +              | -                                | +                     | +                                 | -                     | +                                 | +                        | +                     |
| Harrington et al., 2018    | +              | ?                                | +                     | +                                 | -                     | -                                 | +                        | +                     |
| Jaakkola et al., 2019      | +              | +                                | +                     | +                                 | -                     | -                                 | +                        | +                     |
| Jago et al., 2015          | +              | +                                | +                     | -                                 | +                     | +                                 | +                        | +                     |
| Jago et al., 2017          | ?              | ?                                | +                     | +                                 | -                     | +                                 | +                        | +                     |
| Janz et al., 2014          | +              | +                                | +                     | +                                 | -                     | +                                 | +                        | +                     |
| Jauregui et al., 2012      | -              | ?                                | +                     | +                                 | ?                     | ?                                 | +                        | +                     |
| Leppanen et al., 2017      | ?              | +                                | +                     | +                                 | +                     | +                                 | +                        | +                     |
| Lima et al., 2017          | ?              | +                                | +                     | +                                 | -                     | +                                 | +                        | +                     |
| Lipsky et al., 2017        | +              | +                                | +                     | +                                 | ?                     | +                                 | +                        | +                     |
| Magnusson et al., 2011     | -              | ?                                | -                     | -                                 | -                     | -                                 | +                        | +                     |
| Marquest et al., 2016      | +              | -                                | +                     | +                                 | +                     | +                                 | +                        | +                     |
| Metcalfe et al., 2011      | +              | +                                | +                     | +                                 | -                     | -                                 | +                        | +                     |
| Michels et al., 2016       | +              | +                                | +                     | +                                 | ?                     | ?                                 | +                        | +                     |
| Mitchell et al., 2013      | +              | +                                | +                     | -                                 | -                     | -                                 | +                        | +                     |
| Orlenas et al., 2011       | +              | -                                | +                     | +                                 | -                     | +                                 | +                        | +                     |
| Ortega et al., 2013        | +              | +                                | +                     | +                                 | -                     | +                                 | +                        | +                     |
| Owen et al., 2018          | -              | -                                | +                     | +                                 | +                     | +                                 | +                        | +                     |
| Pardo et al., 2014         | -              | +                                | +                     | +                                 | +                     | +                                 | +                        | +                     |
| Ridgers et al., 2013       | +              | +                                | +                     | +                                 | -                     | +                                 | +                        | +                     |
| Santos et al., 2018        | -              | +                                | +                     | +                                 | +                     | +                                 | +                        | +                     |
| Schwarzfischer., 2019      | +              | -                                | +                     | +                                 | ?                     | +                                 | +                        | +                     |
| Stefan et al., 2018        | +              | +                                | +                     | +                                 | -                     | -                                 | +                        | +                     |
| Stevens et al., 2007       | +              | +                                | +                     | +                                 | +                     | +                                 | +                        | +                     |
| Sutherland et al., 2016    | -              | +                                | +                     | +                                 | -                     | -                                 | +                        | +                     |
| Taylor et al., 2009        | +              | -                                | +                     | +                                 | +                     | +                                 | +                        | +                     |
| Telford et al., 2015       | +              | ?                                | +                     | -                                 | +                     | +                                 | +                        | +                     |
| Ten Hoor et al., 2018      | ?              | +                                | +                     | +                                 | -                     | -                                 | +                        | +                     |
| Vaipuna et al., 2018       | -              | ?                                | +                     | +                                 | -                     | -                                 | +                        | +                     |
| Vaisto et al. 2019         | +              | +                                | +                     | +                                 | -                     | +                                 | +                        | +                     |
| Vaitkeviciute et al., 2016 | -              | +                                | +                     | +                                 | -                     | -                                 | +                        | +                     |
| Van Kann et al., 2016      | -              | -                                | +                     | +                                 | ?                     | ?                                 | +                        | +                     |
| <b>Summary</b>             |                |                                  |                       |                                   |                       |                                   |                          |                       |
| High                       | 20%            | 20%                              | 4%                    | 26%                               | 55%                   | 55%                               | 0%                       | 0%                    |
| Unclear                    | 25%            | 24%                              | 0%                    | 0%                                | 12%                   | 10%                               | 0%                       | 0%                    |
| Low                        | 55%            | 57%                              | 96%                   | 74%                               | 33%                   | 34%                               | 100%                     | 100%                  |

Figure S1. Contour enhanced funnel plot for random effects meta-analysis of standardised mean MVPA difference per year in Boys and girls

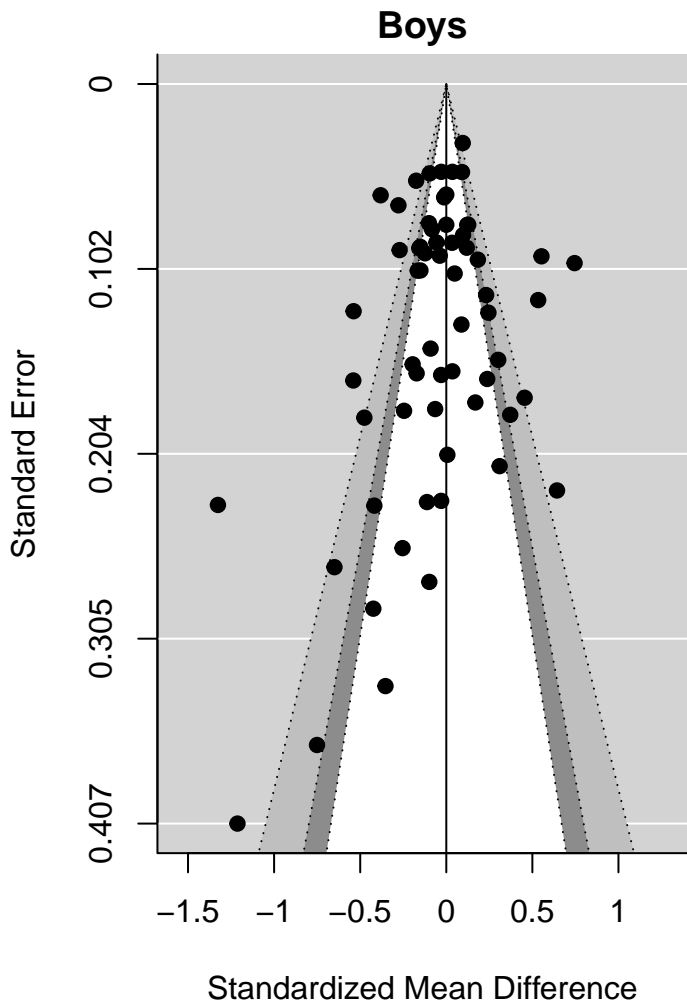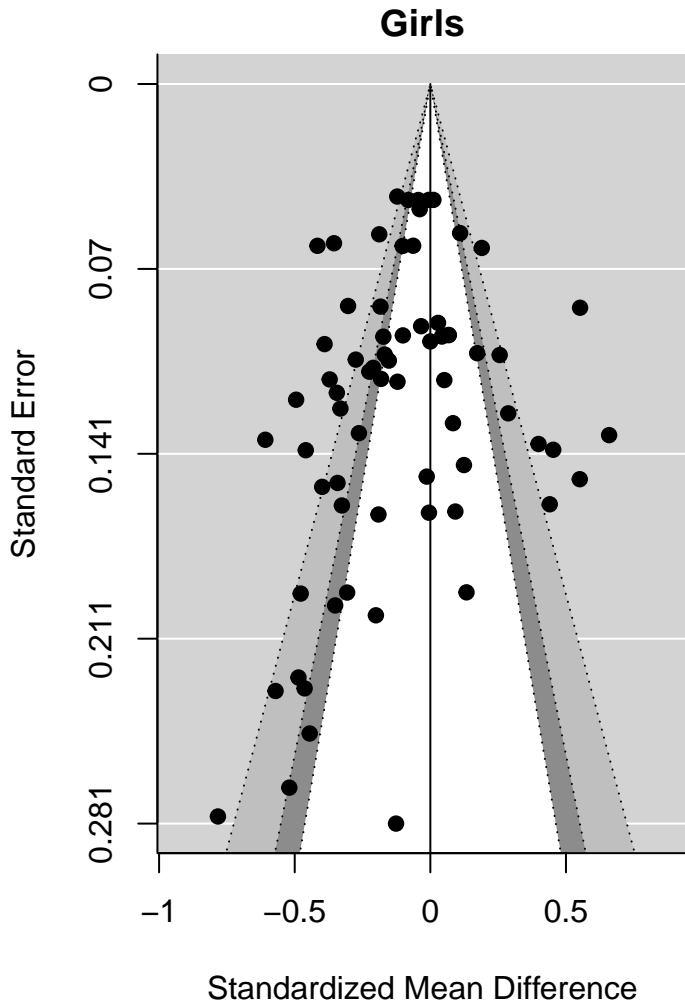

**Table S4. Sensitivity analysis showing estimated annual MVPA change (paired standardised mean difference) according to age in boys and girls assuming correlation coefficients for 0.3, 0.5 and 0.7.**

| Age (years)    | Boys                       |                |                            |                |                            |                | Girls                      |                |                            |                |                            |                |
|----------------|----------------------------|----------------|----------------------------|----------------|----------------------------|----------------|----------------------------|----------------|----------------------------|----------------|----------------------------|----------------|
|                | r=0.3                      |                | r=0.5                      |                | r=0.7                      |                | r=0.3                      |                | r=0.5                      |                | r=0.7                      |                |
|                | SMD (95% CI)               | I <sup>2</sup> | SMD (95% CI)               | I <sup>2</sup> | SMD (95% CI)               | I <sup>2</sup> | SMD (95% CI)               | I <sup>2</sup> | SMD (95% CI)               | I <sup>2</sup> | SMD (95% CI)               | I <sup>2</sup> |
| <b>3</b>       | -0.14(-0.8 to 0.5)         | 95.2           | -0.14(-0.8 to 0.5)         | 95.2           | -0.14(-0.8 to 0.5)         | 95.2           | -0.24(-0.8 to 0.4)         | 93.6           | -0.24(-0.8 to 0.4)         | 93.8           | -0.23(-0.9 to 0.4)         | 94.2           |
| <b>4</b>       | <b>0.31(0.1 to 0.5)</b>    | 84.6           | <b>0.31(0.1 to 0.5)</b>    | 84.0           | <b>0.32(0.1 to 0.6)</b>    | 82.8           | <b>0.24(0.0 to 0.4)</b>    | 75.8           | <b>0.24(0.0 to 0.4)</b>    | 75.0           | <b>0.25(0.1 to 0.4)</b>    | 73.5           |
| <b>5</b>       | 0.25(-0.3 to 0.8)          | 96.3           | 0.24(-0.3 to 0.8)          | 96.5           | 0.21(-0.4 to 0.8)          | 96.9           | 0.26(-0.1 to 0.7)          | 92.6           | 0.25(-0.2 to 0.7)          | 92.9           | 0.24(-0.2 to 0.7)          | 93.5           |
| <b>6</b>       | 0.10(-0.1 to 0.3)          | 65.6           | 0.10(-0.1 to 0.3)          | 69.6           | 0.09(-0.1 to 0.3)          | 75.5           | <b>-0.19(-0.3 to 0.0)</b>  | 46.4           | <b>-0.21(-0.4 to 0.0)</b>  | 60.3           | -0.24(-0.5 to 0.0)         | 75.6           |
| <b>7</b>       | 0.09(-0.2 to 0.4)          | 77.8           | 0.10(-0.2 to 0.4)          | 78.6           | 0.11(-0.2 to 0.4)          | 80.1           | -0.01(-0.3 to 0.3)         | 82.5           | -0.03(-0.4 to 0.3)         | 84.9           | -0.06(-0.4 to 0.3)         | 88.2           |
| <b>8</b>       | -0.09(-0.4 to 0.2)         | 77.4           | -0.09(-0.4 to 0.2)         | 77.4           | -0.09(-0.4 to 0.2)         | 77.4           | -0.11(-0.4 to 0.2)         | 86.5           | -0.11(-0.4 to 0.2)         | 87.6           | -0.10(-0.5 to 0.3)         | 89.2           |
| <b>9</b>       | <b>-0.19(-0.3 to -0.1)</b> | 0.0            | <b>-0.20(-0.3 to -0.1)</b> | 0.3            | <b>-0.23(-0.4 to -0.1)</b> | 21.3           | <b>-0.28(-0.4 to -0.2)</b> | 10.1           | <b>-0.29(-0.4 to -0.2)</b> | 13.9           | <b>-0.32(-0.5 to -0.2)</b> | 27.5           |
| <b>10</b>      | <b>-0.11(-0.2 to 0.0)</b>  | 24.7           | -0.11(-0.2 to 0.0)         | 45.1           | -0.11(-0.3 to 0.0)         | 66.5           | <b>-0.20(-0.3 to -0.1)</b> | 55.4           | <b>-0.22(-0.4 to -0.1)</b> | 70.0           | <b>-0.24(-0.4 to -0.1)</b> | 83.3           |
| <b>11</b>      | -0.05(-0.2 to 0.1)         | 77.6           | -0.06(-0.2 to 0.1)         | 83.4           | -0.07(-0.3 to 0.1)         | 89.4           | -0.06(-0.2 to 0.1)         | 83.1           | -0.06(-0.2 to 0.1)         | 86.8           | -0.06(-0.2 to 0.1)         | 91.2           |
| <b>12</b>      | -0.07(-0.2 to 0.1)         | 54.8           | -0.06(-0.2 to 0.1)         | 61.8           | -0.05(-0.2 to 0.1)         | 71.3           | -0.06(-0.2 to 0.1)         | 73.9           | -0.05(-0.2 to 0.1)         | 78.1           | -0.04(-0.2 to 0.1)         | 83.5           |
| <b>13</b>      | -0.19(-0.4 to 0.1)         | 87.6           | -0.21(-0.5 to 0.1)         | 89.1           | -0.26(-0.5 to 0.0)         | 90.8           | <b>-0.16(-0.2 to -0.1)</b> | 40.9           | <b>-0.16(-0.3 to -0.1)</b> | 44.2           | <b>-0.17(-0.3 to -0.1)</b> | 51.3           |
| <b>14-18</b>   | -0.05(-0.2 to 0.1)         | 75.7           | -0.05(-0.2 to 0.1)         | 75.7           | -0.05(-0.2 to 0.1)         | 75.7           | <b>-0.12(-0.2 to 0.0)</b>  | 72.9           | <b>-0.12(-0.2 to 0.0)</b>  | 73.2           | <b>-0.13(-0.2 to 0.0)</b>  | 73.9           |
| <b>Overall</b> | <b>-0.07(-0.1 to 0.0)</b>  | <b>81.3</b>    | <b>-0.07(-0.1 to 0.0)</b>  | <b>82.8</b>    | <b>-0.06(-0.1 to 0.0)</b>  | <b>85.3</b>    | <b>-0.13(-0.2 to -0.1)</b> | <b>80.6</b>    | <b>-0.14(-0.2 to -0.1)</b> | <b>82.6</b>    | <b>-0.14(-0.2 to -0.1)</b> | <b>85.8</b>    |

**Table S5. Sensitivity analysis showing estimated annual MVPA change (paired standardised mean difference) according to age in boys and girls using random effects (RE) model and quality effects (QE) model**

| Age<br>(years) | Boys                       |                  |                            |                  | Girls                      |                  |                            |                  |
|----------------|----------------------------|------------------|----------------------------|------------------|----------------------------|------------------|----------------------------|------------------|
|                | RE Model                   |                  | QE Model                   |                  | RE Model                   |                  | QE Model                   |                  |
|                | SMD (95% CI)               | p-value          | SMD (95% CI)               | p-value          | SMD (95% CI)               | p-value          | SMD (95% CI)               | p-value          |
| 3              | -0.14(-0.8 to 0.5)         | 0.654            | -0.18(-0.8 to 0.4)         | 0.575            | -0.24(-0.8 to 0.4)         | 0.426            | -0.25(-0.9 to 0.4)         | 0.412            |
| 4              | <b>0.31(0.1 to 0.5)</b>    | <b>0.009</b>     | <b>0.31(0.1 to 0.5)</b>    | <b>0.012</b>     | <b>0.24(0.0 to 0.4)</b>    | <b>0.023</b>     | <b>0.24(0.0 to 0.4)</b>    | <b>0.020</b>     |
| 5              | 0.24(-0.3 to 0.8)          | 0.422            | 0.23(-0.4 to 0.8)          | 0.462            | 0.26(-0.1 to 0.7)          | 0.205            | 0.30(-0.1 to 0.7)          | 0.162            |
| 6              | 0.10(-0.1 to 0.3)          | 0.367            | 0.09(-0.1 to 0.3)          | 0.442            | <b>-0.19(-0.3 to 0.0)</b>  | <b>0.021</b>     | <b>-0.20(-0.4 to 0.0)</b>  | <b>0.044</b>     |
| 7              | 0.10(-0.2 to 0.4)          | 0.530            | 0.03(-0.3 to 0.4)          | 0.869            | -0.01(-0.3 to 0.3)         | 0.924            | 0.00(-0.4 to 0.4)          | 0.983            |
| 8              | -0.09(-0.4 to 0.2)         | 0.499            | 0.01(-0.3 to 0.3)          | 0.965            | -0.11(-0.4 to 0.2)         | 0.491            | -0.10(-0.5 to 0.3)         | 0.580            |
| 9              | <b>-0.20(-0.3 to -0.1)</b> | <b>&lt;0.001</b> | <b>-0.21(-0.3 to -0.1)</b> | <b>&lt;0.001</b> | <b>-0.28(-0.4 to -0.2)</b> | <b>&lt;0.001</b> | <b>-0.28(-0.4 to -0.2)</b> | <b>&lt;0.001</b> |
| 10             | -0.11(-0.2 to 0.0)         | 0.064            | <b>-0.12(-0.2 to 0.0)</b>  | <b>0.042</b>     | <b>-0.20(-0.3 to -0.1)</b> | <b>0.001</b>     | <b>-0.21(-0.4 to -0.1)</b> | <b>0.009</b>     |
| 11             | -0.06(-0.2 to 0.1)         | 0.505            | -0.08(-0.3 to 0.1)         | 0.379            | -0.06(-0.2 to 0.1)         | 0.391            | -0.05(-0.2 to 0.1)         | 0.584            |
| 12             | -0.06(-0.2 to 0.1)         | 0.417            | -0.09(-0.3 to 0.1)         | 0.276            | -0.06(-0.2 to 0.1)         | 0.441            | -0.08(-0.3 to 0.1)         | 0.393            |
| 13             | -0.21(-0.5 to 0.1)         | 0.116            | -0.09(-0.4 to 0.2)         | 0.557            | <b>-0.16(-0.2 to -0.1)</b> | <b>0.001</b>     | <b>-0.16(-0.3 to -0.1)</b> | <b>0.002</b>     |
| 14-18          | -0.05(-0.2 to 0.1)         | 0.515            | 0.01(-0.1 to 0.2)          | 0.934            | <b>-0.12(-0.2 to 0.0)</b>  | <b>0.027</b>     | -0.07(-0.2 to 0.0)         | 0.211            |
| <b>Overall</b> | -0.03(-0.1 to 0.04)        | 0.407            | -0.03(-0.1 to 0.0)         | 0.479            | <b>-0.13(-0.2 to -0.1)</b> | <b>&lt;0.001</b> | <b>-0.08(-0.1 to 0.0)</b>  | <b>0.011</b>     |



**Table S6. Sensitivity analysis showing estimated annual MVPA change (paired standardised mean difference) according to age in boys and girls using random effects (RE) model and quality effects (QE) model**

|                           | FE Model              |         | RE Model              |         |
|---------------------------|-----------------------|---------|-----------------------|---------|
|                           | SMD (95% CI)          | p-value | SMD (95% CI)          | p-value |
| <b>Study design</b>       |                       |         |                       |         |
| Longitudinal studies      | -0.07(-0.09 to -0.05) | <0.001  | -0.06(-0.12 to -0.01) | 0.030   |
| Randomised Control Trials | -0.05(-0.08 to -0.01) | 0.002   | -0.07(-0.15 to 0.02)  | 0.159   |
| Quasi Experimental        | -0.17(-0.27 to -0.06) | <0.001  | -0.22(-0.52 to 0.09)  | 0.125   |
| <b>Epoch Length</b>       |                       |         |                       |         |
| <15s                      | -0.02(-0.05 to 0.00)  | 0.045   | -0.03(-0.09 to 0.03)  | 0.363   |
| 30s                       | -0.03(-0.07 to 0.01)  | 0.207   | -0.07(-0.18 to 0.04)  | 0.230   |
| 60s                       | -0.19(-0.22 to -0.15) | <0.001  | -0.13(-0.23 to -0.02) | 0.016   |
